# Supplementary material for: Fusogenic liposome-enhanced cytosolic delivery of magnetic nanoparticles
Source: RSC Adv. 2021 Nov 4;11(57):35796–805. doi: 10.1039/d1ra03094a (PMC9043121; doi:10.1039/d1ra03094a)
Supplement: RA-011-D1RA03094A-s001 [file RA-011-D1RA03094A-s001.pdf]

## Fusogenic Liposome-Enhanced Cytosolic Delivery of Magnetic Nanoparticles

Fang Chen<sup>1,2</sup> #, Minjuan Bian<sup>1</sup> #, Michael Nahmou<sup>1</sup>, David Myung<sup>1,2,3,\*</sup>, and Jeffrey L Goldberg<sup>1,2,\*</sup>

<sup>1</sup> Department of Ophthalmology, Byers Eye Institute at Stanford University, Palo Alto, CA, 94304, USA;

<sup>2</sup> VA Palo Alto Health Care System, Palo Alto, CA, 94304, USA;

<sup>3</sup> Department of Chemical Engineering, Stanford University, Stanford, CA, 94305, USA

# These authors contributed equally.

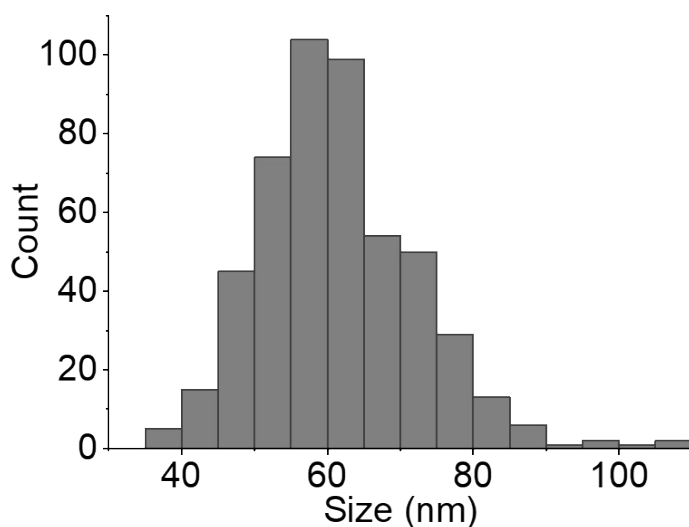

**Figure S1.** Size distribution (diameter) of the magnetic nanoparticles based on TEM measurements. The average diameter of the magnetic nanoparticles is 61 nm, and standard deviation is 11 nm (n=500).

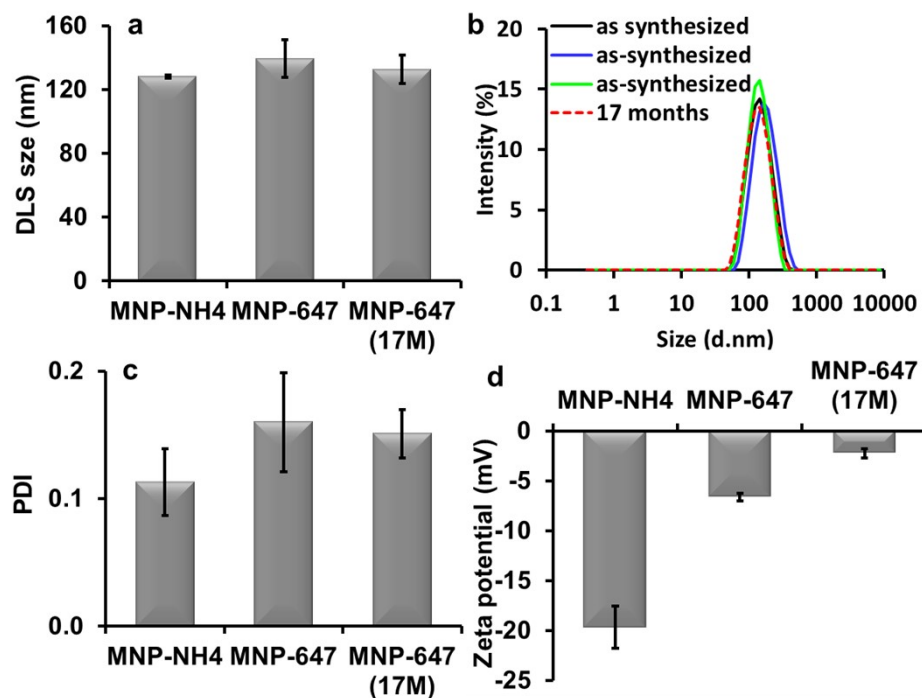

**Figure S2.** Dye conjugation and stability of magnetic nanoparticles. (a) Dynamic light scattering size of magnetic nanoparticles before (MNP-NH4) and after (MNP-647) dye conjugation, and dye-conjugated MNPs after storage in dark at 4°C for 17 months (MNP-647(17M)). (b) Size distribution of magnetic nanoparticles after dye conjugation and 17-month storage. (c) Polydispersity index of magnetic nanoparticles. (d) Surface zeta potential of magnetic nanoparticles.

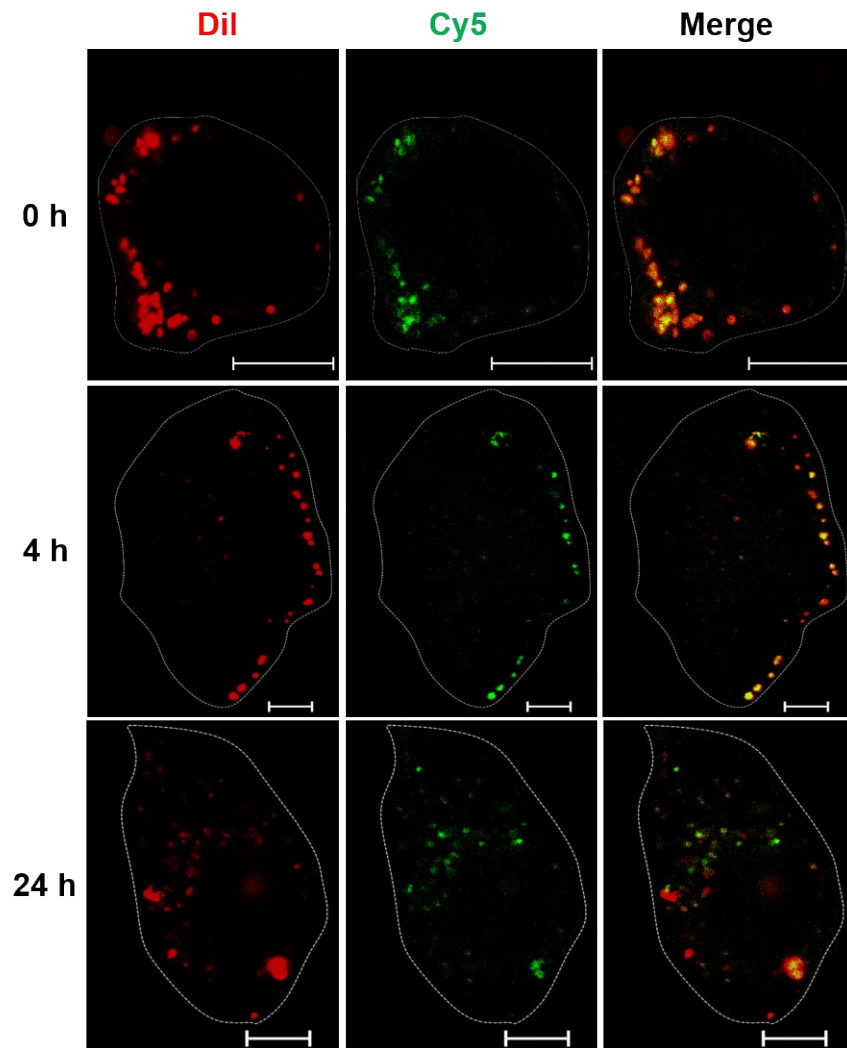

**Figure S3.** Co-localization of DiI and Cy5 signals from liposomes after incubation with ARPE-19 cells. Liposomes labeled with 1,2-distearoyl-sn-glycero-3-phosphoethanolamine-N-[amino(polyethylene glycol)-2000]-N-(Cyanine 5) (DSPE-PEG-CY5) and DiI were incubated with ARPE-19 cells for 10 min. Cells were fixed with 4% paraformaldehyde (PFA) for 10 min at room temperature at 0 h, 4 h and 24 h after liposome incubation. DiI and Cy5 signals were acquired by confocal microscopy. Scale bar = 10  $\mu$ m.

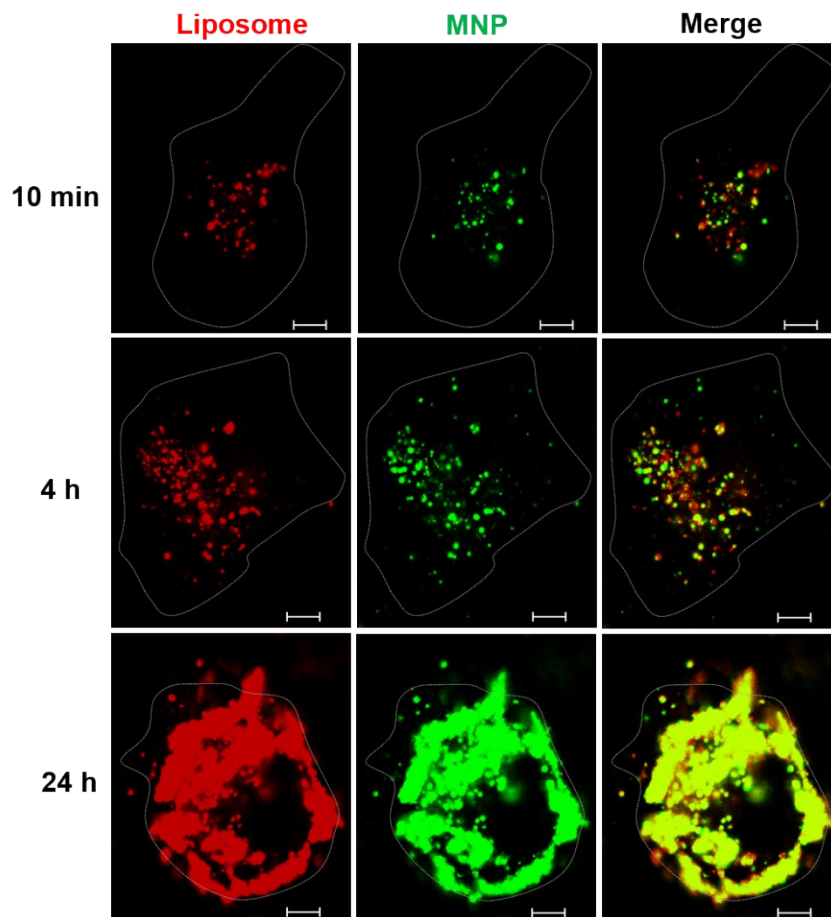

**Figure S4.** Administration of liposome-coated MNPs with different incubation times in ARPE-19 cells. Liposome-coated MNPs suspended in cell culture medium with MNPs at a concentration of 100  $\mu\text{g/ml}$  were administrated to ARPE-19 cells for 10 min, 4 h or 24 h. Cells were washed with PBS and fixed with 4% PFA for 10 min at room temperature at 24 h after liposome application. DiI and Alexa Fluor 647 signals were acquired by confocal microscopy. Scale bar = 10  $\mu\text{m}$ .

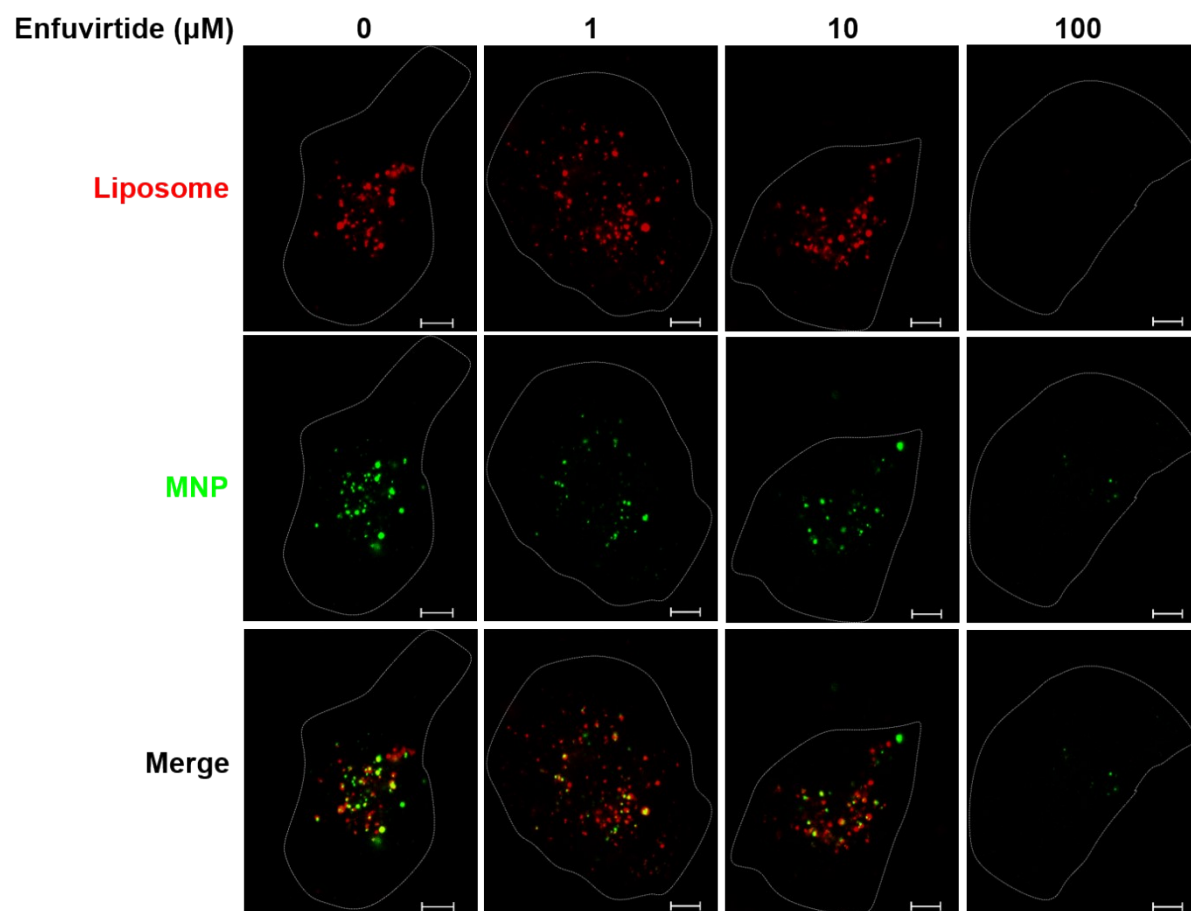

**Figure S5.** The effect of membrane fusion inhibitor on the uptake of liposome-coated MNPs in ARPE-19 cells. ARPE-19 cells were treated with membrane fusion inhibitor enfuvirtide at 1  $\mu\text{M}$ , 10  $\mu\text{M}$  and 100  $\mu\text{M}$  for 1 h prior to 10 min incubation of liposome coated MNPs administration. Cells were washed with PBS and fixed with 4% PFA for 10 min at room temperature at 24 h after liposome incubation. DiI and Alexa Fluor 647 signals were acquired by confocal microscopy. Scale bar = 10  $\mu\text{m}$ .

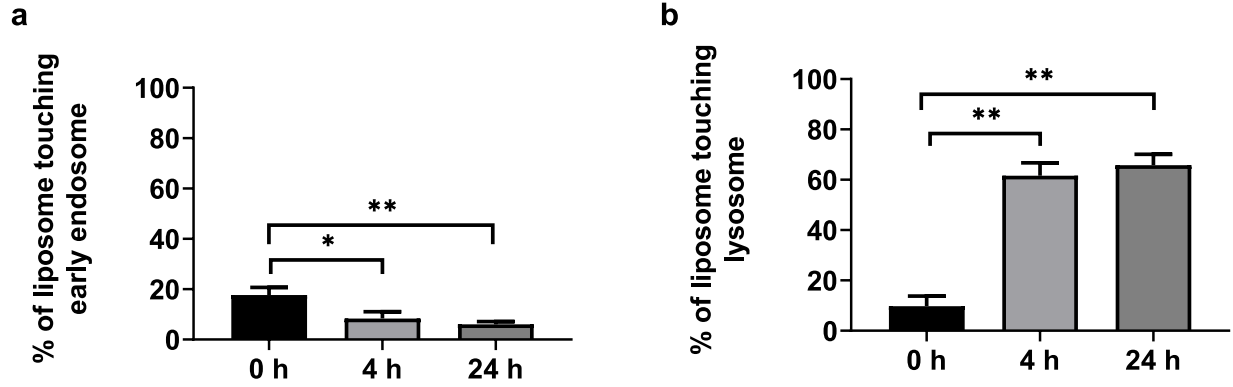

**Figure S6.** Intracellular distribution of liposome after incubation with ARPE-19 cells. CellLight® early endosome-GFP targeting Rab5a or CellLight® lysosome-GFP targeting Lamp1 were incubated with ARPE-19 for 24 h, DiI labeled liposome-coated MNPs were then administrated to ARPE-19 cells for 10 min respectively. Cells were washed with PBS and fixed with 4% PFA for 10 min at room temperature at 0 h, 4 h and 24 h after incubation with liposome-coated MNPs. Early endosome-GFP and DiI or lysosome-GFP and DiI signals were acquired by confocal microscopy; 10-15 cells from each group were recorded. Measurement of identified early endosome-GFP and DiI or lysosome-GFP and DiI positive objects were collected by Volocity, and the fractions of DiI signals touching early endosome-GFP(a) or lysosome-GFP(b) were calculated and analyzed by one-way ANOVA followed by Tukey's multiple comparisons test (\*  $p < 0.05$ , \*\* $p < 0.01$ ,  $n = 10-15$  cells).

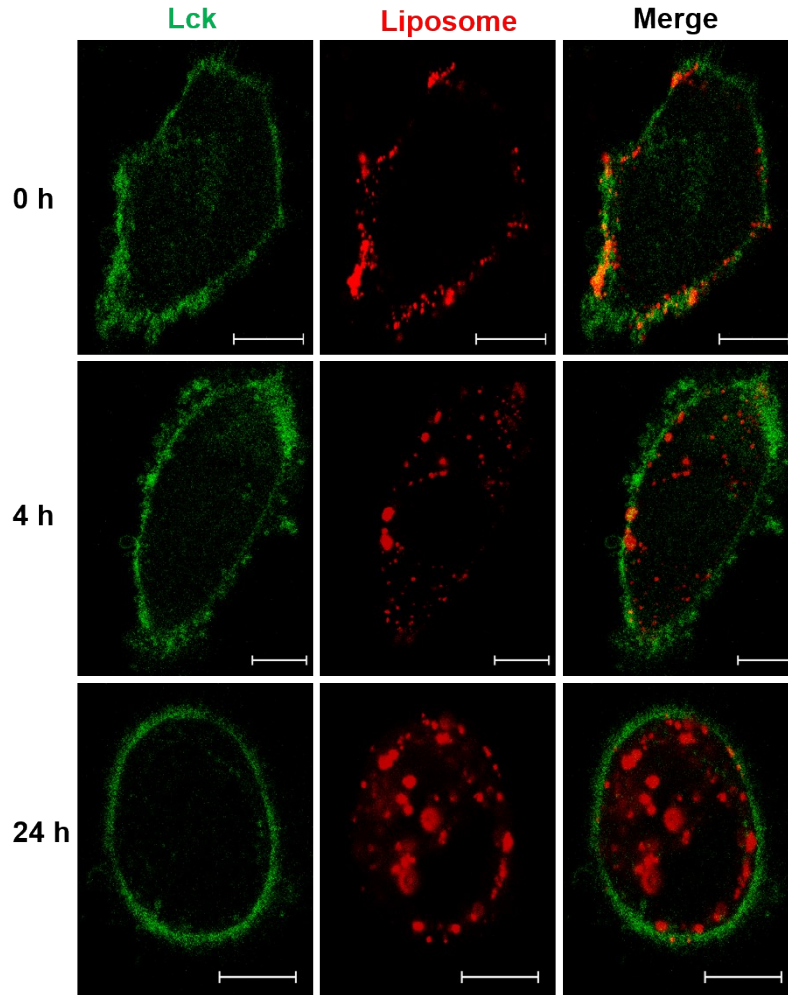

**Figure S7.** Co-localization of liposomes with Lck after incubation with ARPE-19. CellLight® plasma membrane-GFP targeting the myristoylation/palmitoylation sequence from Lck tyrosine kinase was incubated with ARPE-19 for 24 h, DiI labeled liposomes were then administrated to ARPE-19 for 10 min. Cells were washed with PBS and fixed with 4% PFA for 10 min at room temperature at 0 h, 4 h and 24 h after liposome incubation. Lck and DiI signals were acquired by confocal microscopy. Scale bar = 10 μm.
